# Supplementary material for: Alterations in androgen deprivation enhanced prostate-specific membrane antigen (PSMA) expression in prostate cancer cells as a target for diagnostics and therapy
Source: PubMed Central journal article supplement (PMC4648835; doi:10.1186/s13550-015-0145-8), 2015-11-17

# $^{68}\text{Ga}$ -HBED-CC Radio-HPLC

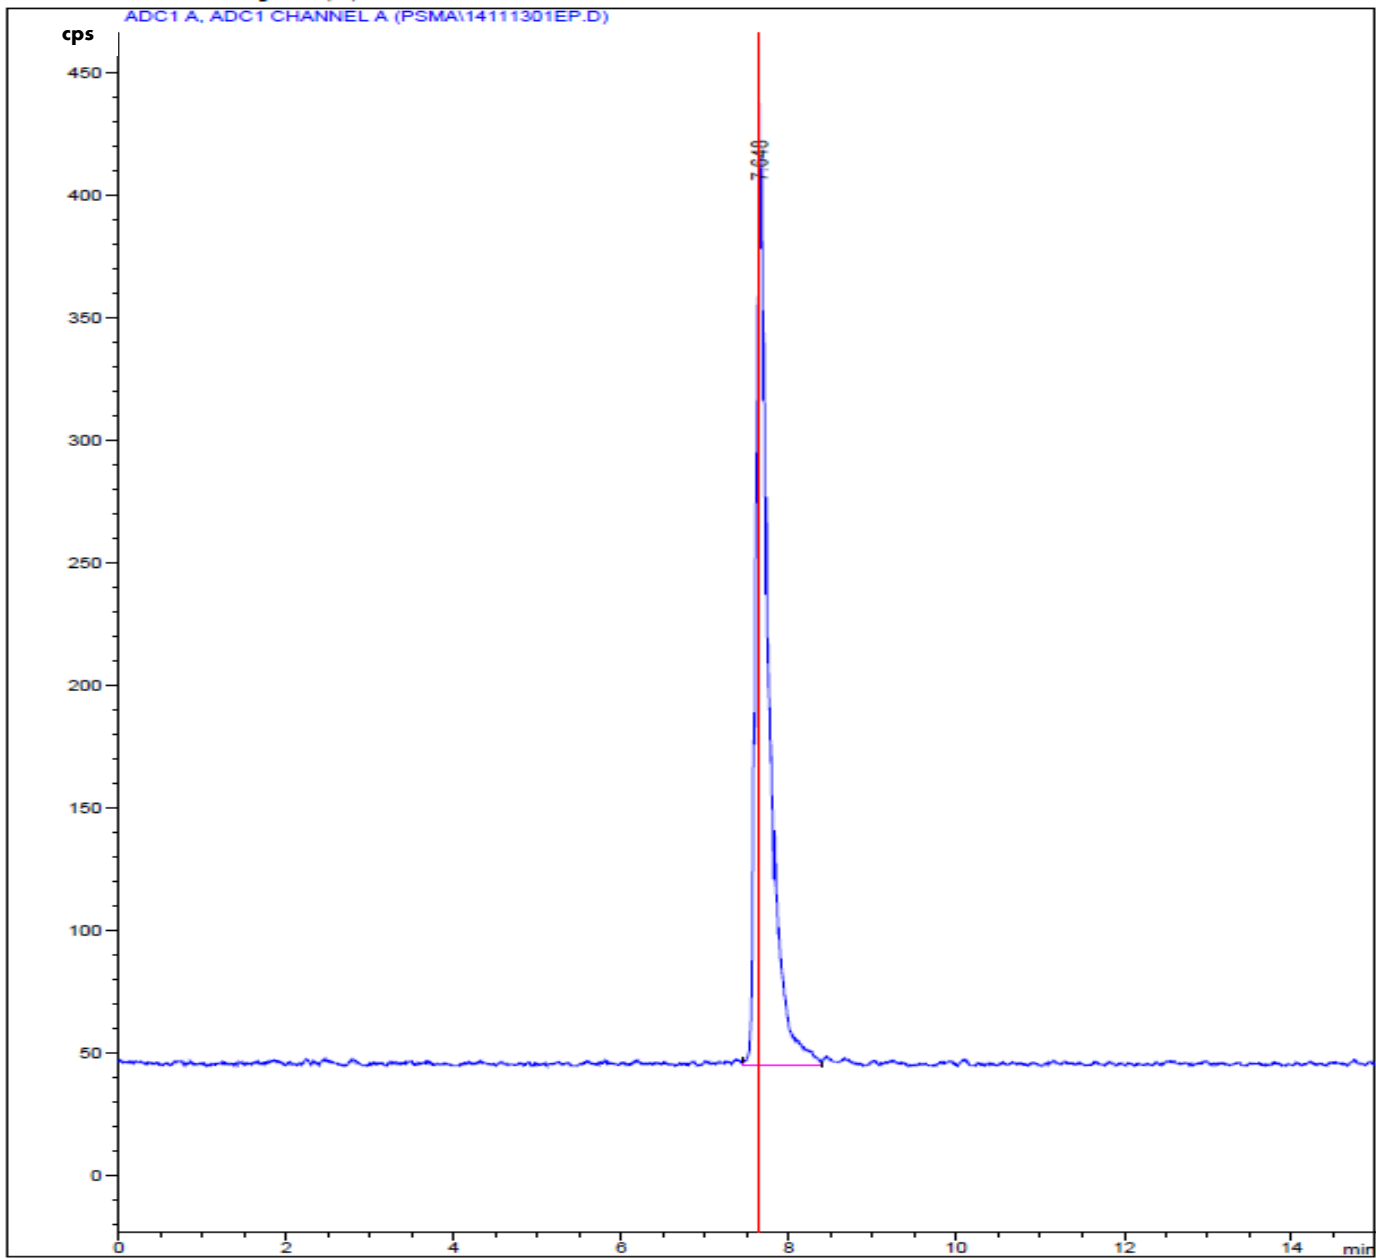

Supplement: 13550_2015_145_MOESM1_ESM.pdf [file 13550_2015_145_MOESM1_ESM.pdf]
